# Supplementary material for: Selective co-production of acetate and methane from wastewater during mesophilic anaerobic fermentation under acidic conditions
Source: Royal Society of Chemistry journal article supplement (doi:10.1039/c6ew00337k), 2017-01-01
Supplement: c6ew00337k1.pdf [file c6ew00337k1.pdf]

*Supplementary Information for*

**Selective co-production of acetate and methane from wastewater during  
mesophilic anaerobic fermentation under acidic pH conditions**

Xin-Rong Pan<sup>1,2,3</sup>, Yun-Kun Wang<sup>1,2</sup>, Wen-Wei Li<sup>1,2,\*</sup>, Yan-Shan Wang<sup>1,2</sup>, Xu  
Wang<sup>1,2</sup>, Yun Cheng<sup>1,2</sup>, Yi-Kun Geng<sup>1,2</sup>, Chen-Xuan Li<sup>1,2</sup>, Paul K.S. Lam<sup>2,3</sup>, Han-  
Qing Yu<sup>1,2,\*</sup>

<sup>1</sup>CAS Key Laboratory of Urban Pollutant Conversion, Department of Chemistry,  
University of Science and Technology of China, Hefei, China

<sup>2</sup>USTC-CityU joint Advanced Research Center, Suzhou, China

<sup>3</sup>State Key Laboratory in Marine Pollution, Department of Biology and Chemistry,  
City University of Hong Kong, Hong Kong SAR, China

**\*Corresponding authors:**

Prof. Wen-Wei Li, Fax: +86 551 63601592, E-mail: [wwli@ustc.edu.cn](mailto:wwli@ustc.edu.cn);

Prof. Han-Qing Yu, Fax: +86 551 63601592, E-mail: [hqyu@ustc.edu.cn](mailto:hqyu@ustc.edu.cn)

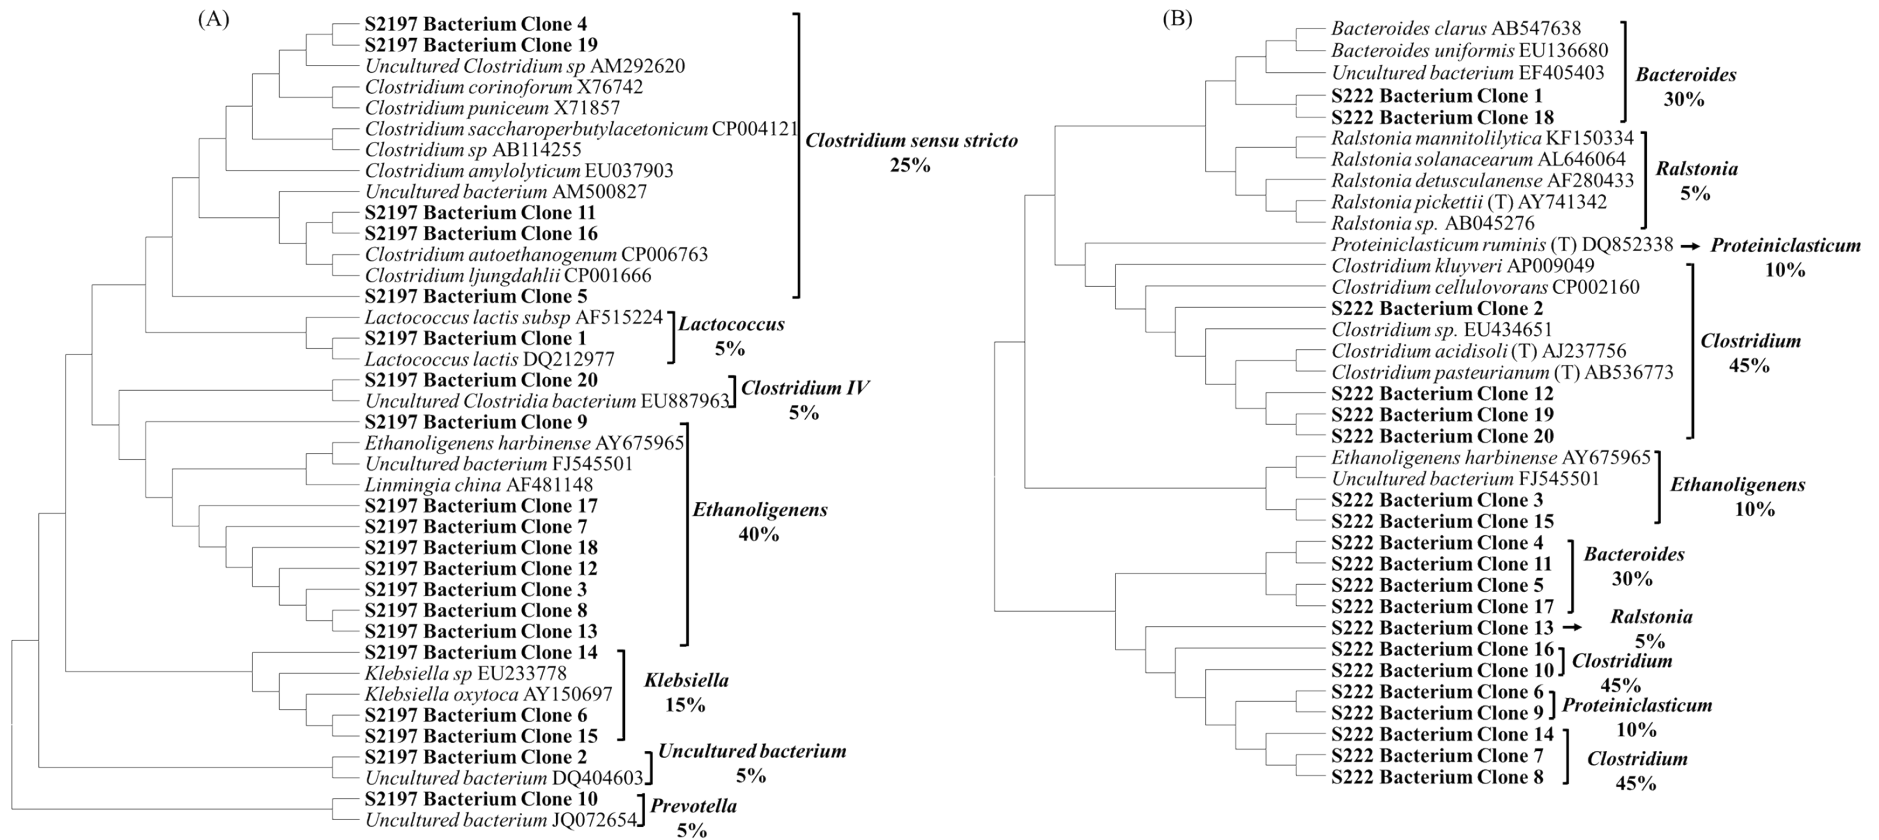

Fig. S1. Bacteria phylogenetic tree of anaerobic sludge (A) pH 5.0 and (B) pH 4.0.

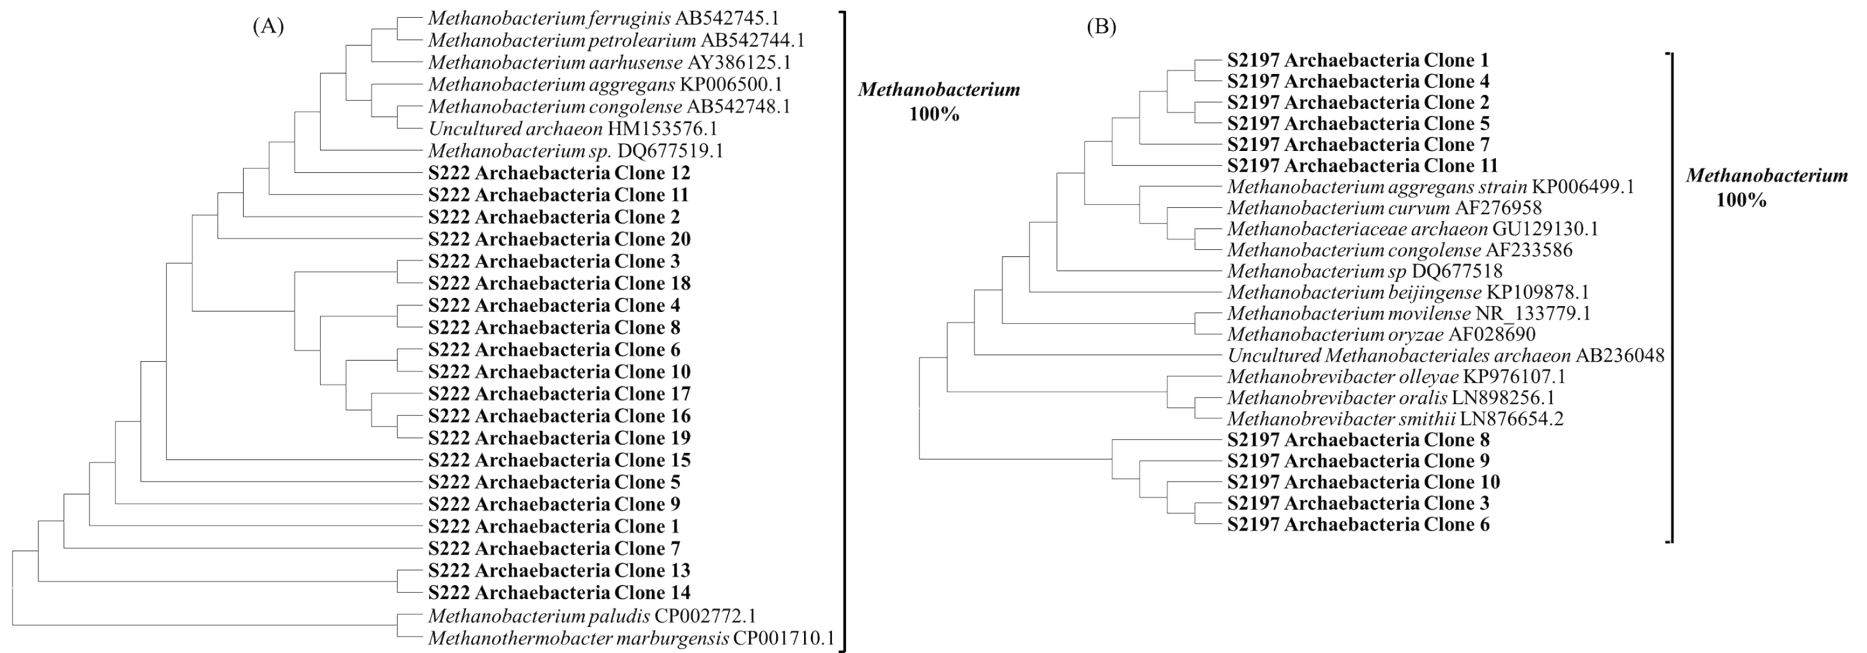

Fig. S2. Archaea phylogenetic tree of anaerobic sludge (A) pH 5.0 and (B) pH 4.0.
